# Supplementary material
Source: publisher figshare collection journal article supplement (https://gsapubs.figshare.com/ndownloader/files/23305289)
Supplement: Supplementary file 1 [file 23305289]

## Sheet: Moho_compilation_revision
Source	Point	Lat.	Lon.	Top	Bottom	Thick	St. Dv.	Basin	Author	Year1	Year2	DOI
1	1	23	-43.1	5	12	7	0.7	A	Abrams	1988	1980	10.1029/JB093iB04p03195
1	2	23.7	-43.9	5	11	6	0.7	A	Abrams	1988	1980	10.1029/JB093iB04p03195
2	3	18.5	156.8	6.5	14.2	7.7	0.7	P	Abrams	1993	1988	10.1029/GM077
3	4	1.95	-80.15	4	10.3	6.3	0.7	P	Agudelo	2009	2001	10.1029/2008jb005690
4	5	73.9	-68	7.2	13.1	5.9	1	A	Altenbend	2016	2010	10.1016/j.tecto.2016.04.001
5	6	12.89	-90.91	7.4	12.5	5.1	1	P	Ambos	1985	1979	10.2973/dsdp.proc.84.139.1985
6	7	34.75	-35.45	2.8	8.5	5.7	0.7	A	Ambos	1986	1980	10.1016/0264-3707(86)90024-4
6	8	35.4	-35.3	2.7	7.9	5.2	0.7	A	Ambos	1986	1980	10.1016/0264-3707(86)90024-4
7	9	23.05	125.15	7.1	13.7	6.6	0.5	P	Arai	2016	2013	10.1038/ncomms12255
7	10	22.58	125.29	6.1	12.4	6.3	0.5	P	Arai	2016	2013	10.1038/ncomms12255
8	11	-47.93	101.83	0	5.9	5.9	0.5	I	Baran	2009	2002	10.1111/j.1365-246X.2009.04300.x
8	12	-49.78	109.62	0	5.3	5.3	0.5	I	Baran	2009	2002	10.1111/j.1365-246X.2009.04300.x
9	13	22.7	-43.6	4.7	10	5.3	1	A	Barrett	1979	1975	10.2973/dsdp.proc.45.1979
9	14	22.95	-43.5	4.2	11.7	7.5	1	A	Barrett	1979	1975	10.2973/dsdp.proc.45.1979
9	15	22.8	-43.45	4.2	10.2	6	1	A	Barrett	1979	1975	10.2973/dsdp.proc.45.1979
9	16	23	-43.4	4.9	10.6	5.7	1	A	Barrett	1979	1975	10.2973/dsdp.proc.45.1979
10	17	20.2	60.5	5.8	11.8	6	1.2	I	Barton	1990	1986	10.1016/0040-1951(90)90227-y
11	18	-24.5	11.5	7.7	15.8	8.1	1.2	A	Bauer	2000	1995	10.1029/2000JB900227
11	19	-25.1	11.6	7.8	14.3	6.5	1.2	A	Bauer	2000	1995	10.1029/2000JB900227
12	20	-17.5	-114.9	3.1	8.7	5.6	0.7	P	Bazin	1998	1995	10.1029/98GL51590
12	21	-17.12	-112.25	2.8	8.6	5.8	0.7	P	Bazin	1998	1995	10.1029/98GL51590
13	22	53.72	-154.4	5	10.7	5.7	0.7	P	Becel	2015	2011	10.1016/j.epsl.2015.05.016
14	23	-43.3	-53	9	14.9	5.9	0.7	A	Becker	2014	2004	10.5194/se-5-1011-2014
14	24	-46.9	-54.7	8.7	16.7	8	0.7	A	Becker	2014	2004	10.5194/se-5-1011-2014
15	25	43.88	159.8	5.8	12.1	6.3	0.5	P	Bee	1989	1982	10.1007/BF00282578
16	26	10.5	-103.6	3.2	8.8	5.6	0.7	P	Begnaud	1997	1994	10.1029/96JB03393
16	27	10.37	-103.6	3.2	9.1	5.9	0.7	P	Begnaud	1997	1994	10.1029/96JB03393
17	28	32.3	-12.8	7.4	14.9	7.5	0.5	A	Biari	2015	2011	10.1016/j.tecto.2015.06.019
18	29	67.1	-4.1	3.4	7.8	4.4	0.7	A	Brandsdottir	2015	2000	10.1002/2014gc005540
19	30	12.3	-104.35	0.5	6	5.5	1	P	Bratt	1984	1979	10.1029/JB089iB07p06111
20	31	66.2	-3.9	4.3	8.2	3.9	1	A	Breivik	2006	2000	10.1029/2005JB004004
20	32	65.7	-2.2	4.5	9	4.5	1	A	Breivik	2006	2000	10.1029/2005JB004004
21	33	-8.5	-13	2.7	8	5.3	1.2	A	Bruguier	2003	1993	10.1029/JB001172
22	34	21.18	-66.05	7.9	13.2	5.3	1	A	Bunce	1969	1963	10.1029/JB074i012p03082
22	35	21.13	-66.33	5.7	9.8	4.1	1	A	Bunce	1969	1963	10.1029/JB074i012p03082
22	36	21.18	-66.36	6.2	9.4	3.2	1	A	Bunce	1969	1963	10.1029/JB074i012p03082
23	37	36.16	-23.5	4	11.5	7.5	1	A	Calvert	1985	1982	10.1016/0012-821X(85)90187-6
24	38	51.85	-30.9	2.5	9.8	7.3	1.2	A	Calvert	1986	1981	10.1144/gsjgs.143.5.0819
25	39	8.68	-104.38	2.9	9.4	6.5	0.5	P	Canales	2003	1997	10.1046/j.1365-246X.2003.01885.x
25	40	9	-104.39	3	9.1	6.1	0.5	P	Canales	2003	1997	10.1046/j.1365-246X.2003.01885.x
25	41	9.6667	-104.47	2.9	9.4	6.5	0.5	P	Canales	2003	1997	10.1046/j.1365-246X.2003.01885.x
25	42	9.57	-104.37	2.9	9.6	6.7	0.5	P	Canales	2003	1997	10.1046/j.1365-246X.2003.01885.x
25	43	8.72	-104.1	3	10.2	7.2	0.5	P	Canales	2003	1997	10.1046/j.1365-246X.2003.01885.x
25	44	9.42	-104.13	3	9.6	6.6	0.5	P	Canales	2003	1997	10.1046/j.1365-246X.2003.01885.x
25	45	10	-104.21	2.8	8.6	5.8	0.5	P	Canales	2003	1997	10.1046/j.1365-246X.2003.01885.x
25	46	8.5	-104.03	2.9	8.5	5.6	0.5	P	Canales	2003	1997	10.1046/j.1365-246X.2003.01885.x
25	47	9.28	-104.08	3	10.1	7.1	0.5	P	Canales	2003	1997	10.1046/j.1365-246X.2003.01885.x
25	48	9.78	-104.1	2.9	9.1	6.2	0.5	P	Canales	2003	1997	10.1046/j.1365-246X.2003.01885.x
26	49	23.3	-44.75	3.9	9	5.1	0.5	A	Canales	2000	1997	10.1029/2000JB900301
26	50	23.35	-45.1	3.6	6.5	2.9	0.5	A	Canales	2000	1997	10.1029/2000JB900301
27	51	34.83	-36.67	1.9	9.7	7.8	0.5	A	Canales	2000	1996	10.1029/1999JB900379
27	52	35.25	-36.17	2.7	7	4.3	0.5	A	Canales	2000	1996	10.1029/1999JB900379
27	53	34.33	-36.78	1.6	8	6.4	0.5	A	Canales	2000	1996	10.1029/1999JB900379
28	54	26.01	-44.92	4.5	8.9	4.4	0.7	A	Canales	2007	2003	10.1029/2007GC001629
29	55	-10.8	-140.9	4.6	9.8	5.2	1.2	P	Caress	1995	1992	10.1038/373600a0
29	56	-7.75	-137.3	4.2	9.7	5.5	1.2	P	Caress	1995	1992	10.1038/373600a0
30	57	24.5	-66	6	13.7	7.7	1.2	A	Cary	1988	1981	10.1029/JB093iB11p13575
31	58	50.5	-131.5	2.5	8.8	6.3	0.5	P	Cheung	1981	1976	10.1111/j.1365-246X.1981.tb02700.x
32	59	9.61	-86.2	4.3	11.2	6.9	0.7	P	Christeson	1999	1996	10.1029/1999JB900251
33	60	58.72	-141.8	6	11.5	5.5	0.5	P	Christeson	2010	2008	10.1130/G31170.1
34	61	44.55	-130.08	2.7	9.1	6.4	0.5	P	Christeson	2010	2004	10.1029/2009gc002864
34	62	44.45	-130.12	2.4	8.8	6.4	0.5	P	Christeson	2010	2004	10.1029/2009gc002864
35	63	49.5	-130.3	2.4	5.2	2.8	1	P	Clowes	1976	1974	10.1139/e76-160
35	64	49.4	-130.7	2.2	10.9	8.7	1	P	Clowes	1976	1974	10.1139/e76-160
36	65	-2.75	44.03	7.1	12.9	5.8	1.2	I	Coffin	1986	1981	10.1111/j.1365-246X.1986.tb03832.x
36	66	-1.92	45.29	7.9	14.1	6.2	1.2	I	Coffin	1986	1981	10.1111/j.1365-246X.1986.tb03832.x
36	67	-2.45	44.75	6.8	12.9	6.1	1.2	I	Coffin	1986	1981	10.1111/j.1365-246X.1986.tb03832.x
36	68	-3.27	44.13	7.2	13.1	5.9	1.2	I	Coffin	1986	1981	10.1111/j.1365-246X.1986.tb03832.x
36	69	-5.07	43.02	6	13.3	7.3	1.2	I	Coffin	1986	1981	10.1111/j.1365-246X.1986.tb03832.x
36	70	-5.49	41.62	5.6	13.9	8.3	1.2	I	Coffin	1986	1981	10.1111/j.1365-246X.1986.tb03832.x
36	71	-8.93	41.93	6	11.1	5.1	1.2	I	Coffin	1986	1981	10.1111/j.1365-246X.1986.tb03832.x
37	72	27.68	-21.1	5.3	13.5	8.2	1	A	Collier	1998	1993	10.1046/j.1365-246X.1998.00675.x
37	73	28.08	-20.87	5.5	12.6	7.1	1	A	Collier	1998	1993	10.1046/j.1365-246X.1998.00675.x
38	74	-2.58	56.64	6.2	10.2	4	0.5	I	Collier	2009	2003	10.1029/2008JB005898
38	75	-2.21	56.89	6.3	10.4	4.1	0.5	I	Collier	2009	2003	10.1029/2008JB005898
38	76	-1.97	57.07	6.5	10.5	4	0.5	I	Collier	2009	2003	10.1029/2008JB005898
39	77	1.25	-83.7	3.7	8.7	5	0.5	P	Collins	1989	1985	10.1029/JB094iB07p09283
40	78	-43.11	-77.82	3.8	9.4	5.6	0.7	P	Contreras-Reyes	2007	2005	10.1029/2007GC001632
40	79	-42.95	-76.45	3.9	9.6	5.7	0.5	P	Contreras-Reyes	2007	2005	10.1029/2007GC001632
40	80	-42.89	-75.61	4.2	9.5	5.3	0.7	P	Contreras-Reyes	2007	2005	10.1029/2007GC001632
41	81	-37.62	-76.4	4.1	11.8	7.7	0.3	P	Contreras-Reyes	2008	2005	10.1029/2007JB005569
41	82	-37.81	-75.18	4.5	11.4	6.9	0.3	P	Contreras-Reyes	2008	2005	10.1029/2007JB005569
42	83	-28.7	-174.6	5.4	11.2	5.8	0.5	P	Contreras-Reyes	2010	2008	10.1016/j.epsl.2009.11.020
42	84	-26.2	-173.85	6	11.1	5.1	0.5	P	Contreras-Reyes	2010	2008	10.1016/j.epsl.2009.11.020
43	85	-24.45	-174.65	7.2	13.4	6.2	0.7	P	Contreras-Reyes	2011	2008	10.1029/2011jb008434
44	86	-32.07	-72.78	4	11.1	7.1	0.7	P	Contreras-Reyes	2015	2000	10.1093/gji/ggv309
44	87	-32.07	-73.1	5.2	12.5	7.3	0.7	P	Contreras-Reyes	2015	2000	10.1093/gji/ggv309
45	88	34.66	-10.8	7.2	15.3	8.1	1	A	Contrucci	2004	2001	10.1111/j.1365-246X.2004.02391.x
46	89	41.25	-124.96	4.1	10.9	6.8	1.5	P	Cook	1981	1977	N/A
46	90	41.22	-125.6	3.8	10.1	6.3	1.5	P	Cook	1981	1977	N/A
46	91	41.23	-126.32	3.2	9.3	6.1	1.5	P	Cook	1981	1977	N/A
46	92	41.27	-126.86	3.2	8.5	5.3	1.5	P	Cook	1981	1977	N/A
46	93	42.49	-126.15	2.8	7.9	5.1	1.5	P	Cook	1981	1977	N/A
46	94	42.371	-126.16	3	8.4	5.4	1.5	P	Cook	1981	1977	N/A
46	95	41.56	-126.15	3.2	8.1	4.9	1.5	P	Cook	1981	1977	N/A
46	96	40.74	-126.1	3.7	9.7	6	1.5	P	Cook	1981	1977	N/A
47	97	-18.9	-170.8	5.4	11	5.6	1.2	P	Crawford	2003	1994	10.1029/2001JB001435
48	98	-13.28	109.52	3.7	13.2	9.5	1.5	I	Curray	1977	1960	10.1029/JB082i017p02479
48	99	-13.78	115.55	6.3	14.8	8.5	1.5	I	Curray	1977	1960	10.1029/JB082i017p02479
48	100	-13.52	118.43	6.3	14.1	7.8	1.5	I	Curray	1977	1960	10.1029/JB082i017p02479
49	101	21.75	-45.25	3.2	10.8	7.6	0.5	A	Dannowski	2011	2004	doi:10.1029/2011GC003534
49	102	21.4	-45.4	4.2	9.2	5	0.5	A	Dannowski	2011	2004	doi:10.1029/2011GC003534
50	103	22.32	-45.23	2.9	5.8	2.9	0.5	A	Dannowski	2013	2010	10.1029/2009JB006943
50	104	22.27	-44.88	4.1	9.4	5.3	0.5	A	Dannowski	2013	2010	10.1029/2009JB006943
51	105	48.9	-128.8	3.5	13.7	10.2	1.5	P	Davis	1976	1973	10.1029/JB081i020p03541
52	106	52.83	-132.95	3.9	10	6.1	1.2	P	Dehler	1988	1983	10.1139/e88-175
53	107	57.8	-54.1	5.2	9.9	4.7	0.5	A	Delescluse	2015	2009	10.1002/2014jb011739
53	108	58.15	-53.2	5.9	10.1	4.2	0.5	A	Delescluse	2015	2009	10.1002/2014jb011739
53	109	58.55	-52.2	5.8	7.1	1.3	0.5	A	Delescluse	2015	2009	10.1002/2014jb011739
54	110	32.49	151.25	6	14.4	8.4	0.5	P	Den	1969	1966	10.1029/JB074i006p01421
54	111	37.95	172.63	6.1	12.5	6.4	1.2	P	Den	1969	1966	10.1029/JB074i006p01421
55	112	20.4	123.2	7.7	13.9	6.2	1.2	P	Deng	2014	2006	10.3319/TAO.2014.08.28.01(T)
55	113	21.6	123.2	6.3	12.1	5.8	1.2	P	Deng	2014	2006	10.3319/TAO.2014.08.28.01(T)
56	114	24.15	-43.9	3.2	8.6	5.4	1	A	Detrick	1980	1977	10.1029/JB085iB07p03759
56	115	22.8	-44.2	3.9	9.9	6	1	A	Detrick	1980	1977	10.1029/JB085iB07p03759
57	116	75.5	35.62	5.2	11.7	6.5	0.5	A	Dossing	2012	2007	10.1029/2011jb008393
58	117	43.9	159.82	6.1	13.4	7.3	0.5	P	Duennebier	1987	1982	N/A1
59	118	35.2	-36.33	3.5	7.5	4	0.5	A	Dunn	2005	1996	10.1029/2004JB003473
59	119	34.88	-36.43	2.3	10.2	7.9	0.5	A	Dunn	2005	1996	10.1029/2004JB003473
59	120	34.7	-36.5	3.4	6.9	3.5	0.5	A	Dunn	2005	1996	10.1029/2004JB003473
60	121	23.17	123.22	8.5	13.1	4.6	0.7	P	Eakin	2015	2009	10.1002/2014GC005548
60	122	22.74	123.25	4.9	10.2	5.3	0.7	P	Eakin	2015	2009	10.1002/2014GC005548
61	123	23.2	63.18	3	9	6	1	I	Edwards	2008	1997	10.1016/j.epsl.2008.05.007
62	124	-63.12	132.18	8.8	15.2	6.4	1.5	I	Eittreim	1994	1985	10.1029/94JB01903
62	125	-64	141.7	8	12.7	4.7	1.5	I	Eittreim	1994	1985	10.1029/94JB01903
63	126	53.47	-155.18	5.2	11.6	6.4	1	P	Ewing	1969	1962	10.1029/JB074i027p06706
63	127	5.33	177.22	6.4	13.3	6.9	1	P	Ewing	1969	1962	10.1029/JB074i027p06706
64	128	47.23	-126.7	3.9	10	6.1	0.7	P	Flueh	1998	1996	10.1016/S0040-1951(98)00091-2
64	129	46.62	-126.45	4	9.2	5.2	0.7	P	Flueh	1998	1996	10.1016/S0040-1951(98)00091-2
65	130	-32.65	-73.4	4.5	10.9	6.4	1	P	Flueh	1998	1995	10.1016/s0040-1951(97)00299-0
65	131	-33.35	-73.3	4.2	10	5.8	1	P	Flueh	1998	1995	10.1016/s0040-1951(97)00299-0
66	132	36.75	-33.3	3.1	6	2.9	0.7	A	Fowler	1976	1973	10.1111/j.1365-246X.1976.tb07097.x
66	133	36.85	-33.45	2.8	7.9	5.1	0.7	A	Fowler	1976	1973	10.1111/j.1365-246X.1976.tb07097.x
66	134	36.7	-33.1	2.7	8	5.3	0.7	A	Fowler	1976	1973	10.1111/j.1365-246X.1976.tb07097.x
67	135	45.4	-27.7	3	11.3	8.3	1	A	Fowler	1978	1973	10.1111/j.1365-246X.1978.tb06762.x
67	136	45.2	-27.3	3.2	9.7	6.5	1	A	Fowler	1978	1973	10.1111/j.1365-246X.1978.tb06762.x
68	137	45.6	-28.7	2.2	9	6.8	1.5	A	Fowler	1979	1968	10.1111/j.1365-246X.1979.tb04777.x
69	138	35.3	-37.95	3.4	10.8	7.4	1	A	Fox	1976	1974	10.1029/JB081i023p04117
69	139	35.75	-37.6	5	12.1	7.1	1	A	Fox	1976	1974	10.1029/JB081i023p04117
70	140	-2.92	47.03	6.5	14.9	8.4	1.5	I	Francis	1966	1963	10.1098/rsta.1966.0010
71	141	-8.28	70.58	4.6	10.8	6.2	1.5	I	Francis	1966	1962	10.1029/JZ071i002p00427
71	142	-5.35	75.08	5.2	10.4	5.2	1.5	I	Francis	1966	1962	10.1029/JZ071i002p00427
71	143	-5.55	63.73	4.6	10.7	6.1	1.5	I	Francis	1966	1962	10.1029/JZ071i002p00427
71	144	-5.45	60.03	4.7	12.5	7.8	1.5	I	Francis	1966	1962	10.1029/JZ071i002p00427
72	145	-26.93	58.17	5.7	11.1	5.4	1.5	I	Francis	1967	1962	10.1029/JZ072i012p03015
72	146	-31.48	61.87	4.6	10.2	5.6	1.5	I	Francis	1967	1962	10.1029/JZ072i012p03015
72	147	-32.92	62.43	5	11.2	6.2	1.5	I	Francis	1967	1962	10.1029/JZ072i012p03015
72	148	-36.85	76.38	3.5	7.4	3.9	1.5	I	Francis	1967	1962	10.1029/JZ072i012p03015
72	149	-37.25	78.52	2.3	10.8	8.5	1.5	I	Francis	1967	1962	10.1029/JZ072i012p03015
72	150	-37.93	87.65	4.1	12.3	8.2	1.5	I	Francis	1967	1962	10.1029/JZ072i012p03015
72	151	-33.8	96.02	4.9	12.1	7.2	1.5	I	Francis	1967	1962	10.1029/JZ072i012p03015
72	152	-32.75	102.75	5.1	12.8	7.7	1.5	I	Francis	1967	1962	10.1029/JZ072i012p03015
72	153	-33.02	103.5	6	12.9	6.9	1.5	I	Francis	1967	1962	10.1029/JZ072i012p03015
72	154	-32.83	108.68	5.9	10.7	4.8	1.5	I	Francis	1967	1962	10.1029/JZ072i012p03015
72	155	-29.7	111.52	5.7	11.7	6	1.5	I	Francis	1967	1962	10.1029/JZ072i012p03015
72	156	-25.05	104.2	5.2	10.1	4.9	1.5	I	Francis	1967	1962	10.1029/JZ072i012p03015
72	157	-20.72	97.2	5.9	12.1	6.2	1.5	I	Francis	1967	1962	10.1029/JZ072i012p03015
72	158	-16.42	89.32	5.9	10.1	4.2	1.5	I	Francis	1967	1962	10.1029/JZ072i012p03015
72	159	-14.95	108.15	5.9	12	6.1	1.5	I	Francis	1967	1962	10.1029/JZ072i012p03015
72	160	-13.78	115.55	6.2	15.2	9	1.5	I	Francis	1967	1962	10.1029/JZ072i012p03015
72	161	-13.52	118.43	6.2	14.6	8.4	1.5	I	Francis	1967	1962	10.1029/JZ072i012p03015
73	162	41.67	147	6.2	13.3	7.1	0.3	P	Fujie	2013	2009	10.1029/2012GL054340
73	163	40.32	148	6.1	13.2	7.1	0.3	P	Fujie	2013	2009	10.1029/2012GL054340
73	164	38.11	149	6.4	12.9	6.5	0.3	P	Fujie	2013	2009	10.1029/2012GL054340
74	165	38.65	145.35	5.8	12.7	6.9	0.3	P	Fujie	2016	2010	10.1002/2015GL067363
74	166	39.2	145.5	5.7	13.2	7.5	0.3	P	Fujie	2016	2010	10.1002/2015GL067363
74	167	39.9	145.6	5.6	12.7	7.1	0.3	P	Fujie	2016	2010	10.1002/2015GL067363
75	168	41.38	-57.25	8.1	12.9	4.8	0.5	A	Funck	2004	2001	10.1029/2004JB003008
76	169	-2.65	-81.85	4.4	11.4	7	0.7	P	Gailler	2007	2001	10.1016/j.epsl.2007.05.045
76	170	1.9	-79.8	5.4	10.8	5.4	0.7	P	Gailler	2007	2001	10.1016/j.epsl.2007.05.045
77	171	44.6	-126.5	4.5	9.1	4.6	0.7	P	Gerdom	2000	1996	10.1016/S0040-1951(00)00190-6
78	172	48.28	-40.29	5.9	11	5.1	0.7	A	Gerlings	2011	2002	10.1111/j.1365-246X.2011.04931.x
79	173	11.8	-103.5	0	6.4	6.4	1	P	Gettrust	1982	1979	10.1029/JB087iB10p08435
79	174	11.7	-101.8	0	5.5	5.5	1	P	Gettrust	1982	1979	10.1029/JB087iB10p08435
80	175	7.6	165.4	1.9	8.8	6.9	1	P	Gladczenko	1997	1975	10.1029/97JB01636
81	176	18.24	129.08	6	10.8	4.8	1	P	Goodman	1989	1981	10.1007/BF00340202.
81	177	16.95	133.42	6	9.8	3.8	1	P	Goodman	1989	1981	10.1007/BF00340202.
82	178	7.2	-50.4	8.7	12.5	3.8	1	A	Greenroyd	2007	2003	10.1111/j.1365-246X.2007.03372.x
83	179	-15.2	-108.4	3.1	9.2	6.1	0.7	P	Grevemeyer	1998	1995	10.1046/j.1365-246X.1998.00673.x
84	180	66.25	-5	4.2	10.8	6.6	1	A	Grevemeyer	2001	1992	10.1023/a:1004288815129
84	181	65.6	-2.2	4.2	10.7	6.5	1	A	Grevemeyer	2001	1992	10.1023/a:1004288815129
85	182	-17.1	90.45	5	10.8	5.8	0.7	I	Grevemeyer	2001	1998	10.1046/j.0956-540X.2000.01334.x
85	183	-17.1	89.89	4.8	11.3	6.5	0.7	I	Grevemeyer	2001	1998	10.1046/j.0956-540X.2000.01334.x
86	184	10.1	-86.84	3.8	8.8	5	0.5	P	Grevemeyer	2007	1999	10.1016/j.epsl.2007.04.013
87	185	13.2	-104.15	2.8	9.1	6.3	0.3	P	Harding	1989	1985	10.1029/JB094iB09p12163
88	186	-3.37	-114.13	4.3	9.2	4.9	0.7	P	Helmberger	1978	1968	N/A
89	187	24.25	-22.9	6.2	13.8	7.6	1	A	Henstock	1996	1990	10.1029/96JB00092
89	188	24.35	-22.82	6.1	13.3	7.2	1	A	Henstock	1996	1990	10.1029/96JB00092
89	189	24.9	-22.75	6.9	13	6.1	1	A	Henstock	1996	1990	10.1029/96JB00092
90	190	77	-1.8	5.8	8.1	2.3	0.7	A	Hermann	2013	2009	10.1093/gji/ggt048
90	191	76.67	1.5	3.4	7.3	3.9	0.7	A	Hermann	2013	2009	10.1093/gji/ggt048
90	192	76.33	4.9	3.8	5.8	2	0.7	A	Hermann	2013	2009	10.1093/gji/ggt048
90	193	76	8.1	3.5	6.3	2.8	0.7	A	Hermann	2013	2009	10.1093/gji/ggt048
91	194	37.22	-123.47	5	12.4	7.4	1.2	P	Holbrook	1996	1991	10.1029/96JB01642
92	195	50.5	-172.2	6.8	11.8	5	1	P	Holbrook	1999	1994	10.1130/0091-7613(1999)027<0031:SACOTA>2.3.CO;2
93	196	-47.9	101.75	3.1	8.3	5.2	0.7	I	Holmes	2008	2002	10.1029/2008GC002152
93	197	-49.6	109.75	4.4	7.9	3.5	0.7	I	Holmes	2008	2002	10.1029/2008GC002152
93	198	-49.8	115	4.2	8.2	4	0.7	I	Holmes	2008	2002	10.1029/2008GC002152
94	199	-48.3	127.2	3.7	10.3	6.6	0.7	I	Holmes	2010	1994	10.1029/2010gl042621
94	200	-50	133.2	4	7.2	3.2	0.7	I	Holmes	2010	1994	10.1029/2010gl042621
94	201	-50.3	133.1	4	8.6	4.6	0.7	I	Holmes	2010	1994	10.1029/2010gl042621
95	202	34.71	-36.47	2.8	8.2	5.4	1	A	Hooft	2000	1996	10.1029/1999JB900442
95	203	35.32	-36.52	3.2	6.2	3	1	A	Hooft	2000	1996	10.1029/1999JB900442
95	204	34.25	-37.16	3.5	9.8	6.3	1	A	Hooft	2000	1996	10.1029/1999JB900442
95	205	33.67	-37.69	4	6.3	2.3	1	A	Hooft	2000	1996	10.1029/1999JB900442
95	206	33.92	-37.75	3.7	8.4	4.7	1	A	Hooft	2000	1996	10.1029/1999JB900442
96	207	45.7	-129.3	2.7	8.9	6.2	0.3	P	Horning	2012	2016	10.1002/2016JB013228
96	208	45.6	-128.9	2.8	9.2	6.4	0.3	P	Horning	2012	2016	10.1002/2016JB013228
96	209	45.3	-127.6	3.1	9.1	6	0.3	P	Horning	2012	2016	10.1002/2016JB013228
96	210	45	-126.5	3.4	9.6	6.2	0.3	P	Horning	2012	2016	10.1002/2016JB013228
97	211	34.83	-36.2	2.2	11	8.8	0.5	A	Hosford	2001	1996	10.1029/2001JB000235
97	212	34.92	-36.67	1.7	10.1	8.4	0.5	A	Hosford	2001	1996	10.1029/2001JB000235
97	213	35.17	-36.58	2.2	7.9	5.7	0.5	A	Hosford	2001	1996	10.1029/2001JB000235
97	214	34.63	-36.3	2.7	9.2	6.5	0.5	A	Hosford	2001	1996	10.1029/2001JB000235
98	215	30.05	-73.48	7.1	11.2	4.1	1.5	A	Houtz	1980	1974	10.1130/0016-7606(1980)91<406:csotna>2.0.co;2
98	216	23.92	-68.88	6.5	12.5	6	1.5	A	Houtz	1980	1974	10.1130/0016-7606(1980)91<406:csotna>2.0.co;2
98	217	31.37	-72.38	7.1	13.4	6.3	1.5	A	Houtz	1980	1974	10.1130/0016-7606(1980)91<406:csotna>2.0.co;2
98	218	30.22	-73.05	7.5	12.6	5.1	1.5	A	Houtz	1980	1974	10.1130/0016-7606(1980)91<406:csotna>2.0.co;2
98	219	31.35	-75.3	8.2	16.1	7.9	1.5	A	Houtz	1980	1974	10.1130/0016-7606(1980)91<406:csotna>2.0.co;2
98	220	36.37	-69.47	6.4	15.1	8.7	1.5	A	Houtz	1980	1974	10.1130/0016-7606(1980)91<406:csotna>2.0.co;2
98	221	35.68	-70.65	6.1	12.9	6.8	1.5	A	Houtz	1980	1974	10.1130/0016-7606(1980)91<406:csotna>2.0.co;2
98	222	34.58	-69.07	6.2	12	5.8	1.5	A	Houtz	1980	1974	10.1130/0016-7606(1980)91<406:csotna>2.0.co;2
98	223	33.82	-69.3	6.1	12.3	6.2	1.5	A	Houtz	1980	1974	10.1130/0016-7606(1980)91<406:csotna>2.0.co;2
98	224	32.73	-70.13	6.7	13	6.3	1.5	A	Houtz	1980	1974	10.1130/0016-7606(1980)91<406:csotna>2.0.co;2
98	225	30.63	-74.3	7.7	14.1	6.4	1.5	A	Houtz	1980	1974	10.1130/0016-7606(1980)91<406:csotna>2.0.co;2
98	226	37.62	-65.72	5.1	9.7	4.6	1.5	A	Houtz	1980	1974	10.1130/0016-7606(1980)91<406:csotna>2.0.co;2
98	227	37.75	-63.05	6.4	11.8	5.4	1.5	A	Houtz	1980	1974	10.1130/0016-7606(1980)91<406:csotna>2.0.co;2
98	228	34.87	-68.52	6.3	13.8	7.5	1.5	A	Houtz	1980	1974	10.1130/0016-7606(1980)91<406:csotna>2.0.co;2
98	229	35.17	-68.98	6.1	11.7	5.6	1.5	A	Houtz	1980	1974	10.1130/0016-7606(1980)91<406:csotna>2.0.co;2
98	230	35.2	-69.32	6.2	11.3	5.1	1.5	A	Houtz	1980	1974	10.1130/0016-7606(1980)91<406:csotna>2.0.co;2
99	231	33.1	144.6	6.4	14.1	7.7	1.5	P	Houtz	1980	1976	10.1029/JB085iB01p00267
99	232	34.3	145.04	6.3	14.1	7.8	1.5	P	Houtz	1980	1976	10.1029/JB085iB01p00267
99	233	34.56	155.11	6.6	12.3	5.7	1.5	P	Houtz	1980	1976	10.1029/JB085iB01p00267
99	234	34.03	150.58	7	11.3	4.3	1.5	P	Houtz	1980	1976	10.1029/JB085iB01p00267
99	235	34.73	144.07	6.3	14.5	8.2	1.5	P	Houtz	1980	1976	10.1029/JB085iB01p00267
99	236	39.77	146.46	5.6	12.9	7.3	1.5	P	Houtz	1980	1976	10.1029/JB085iB01p00267
99	237	34.09	150.7	6.5	11.3	4.8	1.5	P	Houtz	1980	1976	10.1029/JB085iB01p00267
99	238	34.52	146.64	6.2	13.1	6.9	1.5	P	Houtz	1980	1976	10.1029/JB085iB01p00267
100	239	-10.8	-81.8	4	10.2	6.2	1.5	P	Hussong	1976	1972	10.1029/GM019p0071
100	240	-10.2	-82.8	6.3	11.4	5.1	1.5	P	Hussong	1976	1972	10.1029/GM019p0071
100	241	-8.4	-82.2	4.3	11.4	7.1	1.5	P	Hussong	1976	1972	10.1029/GM019p0071
100	242	-7.9	-82	4.3	11.2	6.9	1.5	P	Hussong	1976	1972	10.1029/GM019p0071
101	243	22.75	-7.12	4.6	8.1	3.5	0.7	A	Hussong	1978	1974	10.2973/dsdp.proc.45.102.1979
102	244	-12.5	-160.1	5.1	12	6.9	1.2	P	Hussong	1979	1973	10.1029/JB084iB11p06003
103	245	10.7	-88.5	3.7	9.7	6	0.5	P	Ivandic	2010	2005	10.1111/j.1365-246X.2009.04474.x
103	246	10.55	-87.4	2.8	8.9	6.1	0.5	P	Ivandic	2010	2005	10.1111/j.1365-246X.2009.04474.x
104	247	40.88	146.15	6	13.7	7.7	1.5	P	Iwasaki	1989	1983	10.1016/0040-1951(89)90056-5
105	248	84.4	11	4	6.7	2.7	1.2	A	Jackson	1982	1979	10.1029/JB087iB03p01773
106	249	22.75	-46.08	4.3	10.9	6.6	0.5	A	Jacobson	1984	1979	10.2973/dsdp.proc.78b.113.1984
107	250	34.5	-10.6	7.8	16.2	8.4	1	A	Jaffal	2009	2001	10.1016/j.crte.2009.04.003
108	251	76.4	7.4	2.9	8.2	5.3	0.7	A	Jokat	2012	2009	10.1029/2012gl051199
108	252	76	7.5	3.6	7.4	3.8	0.7	A	Jokat	2012	2009	10.1029/2012gl051199
109	253	84.1	0	3.9	8.8	4.9	1	A	Jokat	2006	2001	10.1111/j.1365-246X.2006.03278.x
109	254	83.5	-5	4	6.5	2.5	1	A	Jokat	2006	2001	10.1111/j.1365-246X.2006.03278.x
109	255	85.9	14	4.9	7.4	2.5	1	A	Jokat	2006	2001	10.1111/j.1365-246X.2006.03278.x
109	256	86	24	4.6	6.7	2.1	1	A	Jokat	2006	2001	10.1111/j.1365-246X.2006.03278.x
109	257	86.9	65	4.9	8.4	3.5	1	A	Jokat	2006	2001	10.1111/j.1365-246X.2006.03278.x
109	258	86.7	42.5	4	7.3	3.3	1	A	Jokat	2006	2001	10.1111/j.1365-246X.2006.03278.x
110	259	76.7	8.2	4.5	8.3	3.8	1	A	Kandilarov	2008	2002	10.1007/s11001-008-9050-0
110	260	76.4	10.9	6.2	10.9	4.7	1	A	Kandilarov	2008	2002	10.1007/s11001-008-9050-0
111	261	18	155.95	6.2	13.9	7.7	0.5	P	Kaneda	2010	2006	10.1029/2010gc003231
111	262	19.5	156.5	6.4	13.8	7.4	0.5	P	Kaneda	2010	2006	10.1029/2010gc003231
111	263	24.6	157.8	6.1	13.4	7.3	0.5	P	Kaneda	2010	2006	10.1029/2010gc003231
112	264	23.6	-46.5	3	9.1	6.1	1.2	A	Kasahara	1980	1975	10.1016/0025-3227(80)90031-6
112	265	23.7	-46.5	3	7.1	4.1	1.2	A	Kasahara	1980	1975	10.1016/0025-3227(80)90031-6
112	266	23.1	-46.1	3	8.5	5.5	1.2	A	Kasahara	1980	1975	10.1016/0025-3227(80)90031-6
112	267	23	-45.8	3	8.1	5.1	1.2	A	Kasahara	1980	1975	10.1016/0025-3227(80)90031-6
113	268	26.41	-75.04	5.6	11.6	6	1.5	A	Katz	1956	1951	10.1130/0016-7606(1956)67[475:smitao]2.0.co;2
113	269	27.28	-75.02	5.3	12.6	7.3	1.5	A	Katz	1956	1951	10.1130/0016-7606(1956)67[475:smitao]2.0.co;2
113	270	28.05	-73.73	6.2	14	7.8	1.5	A	Katz	1956	1951	10.1130/0016-7606(1956)67[475:smitao]2.0.co;2
113	271	29.425	-72.88	5.8	12.9	7.1	1.5	A	Katz	1956	1951	10.1130/0016-7606(1956)67[475:smitao]2.0.co;2
113	272	31.68	-67.72	5.8	11.5	5.7	1.5	A	Katz	1956	1951	10.1130/0016-7606(1956)67[475:smitao]2.0.co;2
114	273	45.6	-28.3	2.4	7.5	5.1	1	A	Keen	1970	1968	10.1111/j.1365-246X.1970.tb06087.x
115	274	26.5	-147.55	2.8	8.9	6.1	0.7	P	Kempner	1982	1978	10.1029/JB087iB10p08447
115	275	29.15	-148.2	2.8	8.8	6	0.7	P	Kempner	1982	1978	10.1029/JB087iB10p08447
115	276	28.8	-148.1	2.8	9.1	6.3	0.7	P	Kempner	1982	1978	10.1029/JB087iB10p08447
116	277	-0.22	97	7.8	14.6	6.8	1.5	I	Kieckhefer	1980	1977	10.1029/JB085iB02p00863
117	278	71.35	4.2	4	8.2	4.2	0.7	A	Klingelhoefer	2000	1988	10.1046/j.1365-246x.2000.00098.x
117	279	71.75	3.94	3.4	7.8	4.4	0.7	A	Klingelhoefer	2000	1988	10.1046/j.1365-246x.2000.00098.x
117	280	72.13	3.05	2.1	5.8	3.7	0.7	A	Klingelhoefer	2000	1988	10.1046/j.1365-246x.2000.00098.x
117	281	72.31	2.51	2.1	5	2.9	0.7	A	Klingelhoefer	2000	1988	10.1046/j.1365-246x.2000.00098.x
118	282	-8.2	-14.7	4	9.3	5.3	1	A	Klingelhoefer	2001	1999	10.1016/S0012-821X(01)00362-4
119	283	23.92	-21.9	7.8	13.2	5.4	0.7	A	Klingelhoefer	2009	2002	10.1016/j.tecto.2008.07.022
120	284	25.12	128.9	1.8	7.7	5.9	1	P	Kodaira	1996	1988	10.1016/S0040-1951(96)00025-X
121	285	31.6	134.9	5.8	11.5	5.7	0.5	P	Kodaira	2000	1995	10.1029/1999JB900394
122	286	-7.3	101.57	8	16.2	8.2	0.7	I	Kopp	2001	1999	10.1046/j.0956-540x.2001.01547.x
122	287	-9.85	102.8	6.2	14	7.8	0.7	I	Kopp	2001	1999	10.1046/j.0956-540x.2001.01547.x
123	288	-9.83	106	5.3	12.7	7.4	0.7	I	Kopp	2002	1999	10.1029/2000jb000095
124	289	-32.35	-74.33	4.5	11.8	7.3	0.5	P	Kopp	2004	2000	10.1029/2003TC001590
125	290	16.9	-58.9	10.5	18.3	7.8	0.5	A	Kopp	2011	2004	10.1016/j.epsl.2011.01.024
126	291	32.6	-161.1	5.6	12.8	7.2	0.7	P	Kopp	2003	1999	10.1029/2002jb002015
126	292	26.5	-161.3	4.6	11.1	6.5	0.7	P	Kopp	2003	1999	10.1029/2002jb002015
127	293	-8.5	-81.8	5.1	10.3	5.2	0.7	P	Krabbenhoeft	2004	2000	10.1111/j.1365-246X.2004.02425.x
127	294	-11.8	-80.5	5	10.8	5.8	0.7	P	Krabbenhoeft	2004	2000	10.1111/j.1365-246X.2004.02425.x
127	295	-14	-77.9	4.8	11.2	6.4	0.7	P	Krabbenhoeft	2004	2000	10.1111/j.1365-246X.2004.02425.x
128	296	14.1	53	3.8	9.6	5.8	1.2	I	Laughton	1966	1958	10.1098/rsta.1966.0004
129	297	-20.81	40.9	6	13.6	7.6	0.5	I	Leinweber	2010	2007	10.1016/j.tecto.2013.04.015
130	298	-64.7	25.5	7.3	13.3	6	1.5	I	Leitchenkov	2008	1996	10.1007/s11001-008-9051-z
130	299	-67.5	24	7.6	13.5	5.9	1.5	I	Leitchenkov	2008	1996	10.1007/s11001-008-9051-z
131	300	-63.5	108.5	7.8	13.4	5.6	1.2	I	Leitchenkov	2014	1996	10.1134/S001685211401004X
132	301	40.58	-125.6	3.3	10	6.7	1.2	P	Leitner	1998	1994	10.1029/98JB02050
133	302	38.75	-39.04	5.7	10.9	5.2	1.2	A	LePichon	1965	1955	10.1029/JZ070i002p00319
133	303	39.12	-37.13	4.6	8.4	3.8	1.2	A	LePichon	1965	1955	10.1029/JZ070i002p00319
133	304	35.29	-26.04	4.1	9.4	5.3	1.2	A	LePichon	1965	1955	10.1029/JZ070i002p00319
133	305	31.88	-32.71	4.4	9.3	4.9	1.2	A	LePichon	1965	1955	10.1029/JZ070i002p00319
133	306	31.85	-31.14	5	11.1	6.1	1.2	A	LePichon	1965	1955	10.1029/JZ070i002p00319
133	307	2.45	-19.66	5.5	9.9	4.4	1.2	A	LePichon	1965	1955	10.1029/JZ070i002p00319
133	308	0.17	-22.68	3.9	9.4	5.5	1.2	A	LePichon	1965	1955	10.1029/JZ070i002p00319
133	309	0.08	-23.86	3.8	8.3	4.5	1.2	A	LePichon	1965	1955	10.1029/JZ070i002p00319
133	310	-0.92	-26.24	4.6	7.9	3.3	1.2	A	LePichon	1965	1955	10.1029/JZ070i002p00319
133	311	-1.27	26.67	4.6	9.4	4.8	1.2	A	LePichon	1965	1955	10.1029/JZ070i002p00319
134	312	12.1	-103.8	3	9	6	1.2	P	Lewis	1982	1979	10.1029/JB087iB10p08417
134	313	12.5	-103.65	3	8.1	5.1	1.2	P	Lewis	1982	1979	10.1029/JB087iB10p08417
134	314	12.4	-104.2	3	8.1	5.1	1.2	P	Lewis	1982	1979	10.1029/JB087iB10p08417
135	315	14.4	-95	3.6	9.7	6.1	1.2	P	Lewis	1977	1973	10.1038/266340a0
136	316	12.8	-103.8	3.1	8.1	5	1	P	Lewis	1979	1973	10.1016/0040-1951(79)90336-6
136	317	13.3	-102.5	3.3	8.8	5.5	1	P	Lewis	1979	1973	10.1016/0040-1951(79)90336-6
136	318	13	-100.7	3.2	9.7	6.5	1	P	Lewis	1979	1973	10.1016/0040-1951(79)90336-6
137	319	-37.67	50.48	1.9	11.1	9.2	0.5	I	Li	2015	2010	10.1002/2014GL062521
137	320	-37.7	49.97	3.4	7.1	3.7	0.5	I	Li	2015	2010	10.1002/2014GL062521
137	321	-37.75	49.75	3	10.2	7.2	0.5	I	Li	2015	2010	10.1002/2014GL062521
137	322	-37.77	49.53	3.5	7.4	3.9	0.5	I	Li	2015	2010	10.1002/2014GL062521
138	323	75	8.8	3.3	7.6	4.3	0.7	A	Libak	2012	2008	10.1016/j.tecto.2011.09.020
138	324	74.8	12.3	6.2	10.8	4.6	0.7	A	Libak	2012	2008	10.1016/j.tecto.2011.09.020
139	325	19.25	-159.1	4.5	10.9	6.4	0.5	P	Lindwall	1991	1986	10.1029/91JB00149
140	326	31.5	-69	6	12.9	6.9	0.5	A	Lizarralde	2004	2001	10.1038/nature03140
140	327	31	-68.2	6.1	12.6	6.5	0.5	A	Lizarralde	2004	2001	10.1038/nature03140
140	328	29.7	-65	5.7	11.3	5.6	0.5	A	Lizarralde	2004	2001	10.1038/nature03140
141	329	52.2	-163.4	6.2	12	5.8	1	P	Lizarralde	2002	1994	10.1029/2001JB000230
142	330	-4.8	79.88	5.1	10.5	5.4	1.2	I	Louden	1995	1988	10.1111/j.1365-246X.1995.tb01826.x
142	331	-4.5	79.88	4.8	10.6	5.8	1.2	I	Louden	1995	1988	10.1111/j.1365-246X.1995.tb01826.x
142	332	-5.4	79.83	5.2	11.4	6.2	1.2	I	Louden	1995	1988	10.1111/j.1365-246X.1995.tb01826.x
142	333	-4.25	79.4	4.9	11.1	6.2	1.2	I	Louden	1995	1988	10.1111/j.1365-246X.1995.tb01826.x
143	334	21.5	-126.5	4.6	11	6.4	0.7	P	Ludwig	1980	1976	10.1016/0025-3227(80)90025-0
144	335	10.75	-42.5	4.6	9.6	5	1.2	A	Ludwig	1980	1975	10.1016/0025-3227(80)90024-9
144	336	10.85	-42.5	5.8	10.5	4.7	1.2	A	Ludwig	1980	1975	10.1016/0025-3227(80)90024-9
145	337	-4.55	42.5	7.8	13.1	5.3	1	I	Makris	2012	2007	NA/3
146	338	-47.6	-77.4	4.1	9.8	5.7	0.3	P	Maksymowicz	2012	2004	10.1016/j.epsl.2012.06.023
147	339	49.45	-129.8	3.4	11.4	8	1		Malecek	1978	1974	10.1029/JB083iB12p05899
148	340	22.4	-108.3	3.1	9	5.9	0.5	P	McClain	1980	1976	10.1016/0025-3227(80)90028-6
149	341	-14.5	-111.75	3	10	7	1	P	McClain	1985	1953	10.1029/GL012i010p00689
149	342	-15	-112.6	3	8.5	5.5	1	P	McClain	1985	1953	10.1029/GL012i010p00689
150	343	47.2	-129.15	2.7	8.3	5.6	1	P	McClain	1982	1978	10.1029/JB087iB10p08477
151	344	47.9	-127.8	4.5	10.5	6	0.5	P	McClymont	2005	1980	10.1016/j.tecto.2005.05.026
152	345	-19.1	-73.5	4.5	11.1	6.6	1	P	Meeder	1977	1976	10.1016/0012-821X(77)90142-X
153	346	-135.6	48.35	4.6	9.3	4.7	1.5	P	Milne	1964	1958	NA6
154	347	26.9	-70.08	6.3	13.4	7.1	0.5	A	Minshull	1991	1987	10.1029/91JB00431
154	348	27.4	-69.88	6.5	14.1	7.6	0.5	A	Minshull	1991	1987	10.1029/91JB00431
155	349	-8.61	-13.13	2.9	8.6	5.7	0.7	A	Minshull	2003	1993	10.1029/2002JB002360
155	350	-8.88	-13.15	3	10.1	7.1	0.7	A	Minshull	2003	1993	10.1029/2002JB002360
156	351	17.2	65	9	13.6	4.6	0.7	I	Minshull	2008	2003	10.1038/ngeo228
156	352	17.9	65.1	8.9	13	4.1	0.7	I	Minshull	2008	2003	10.1038/ngeo228
157	353	-31.5	62	4	8.8	4.8	1.5	I	Minshull	1996	1962	10.1111/j.1365-246X.1996.tb06541.x
158	354	-27.58	65.85	5.25	7.75	2.5	0.5	I	Minshull	2006	1999	10.1111/j.1365-246X.2006.03001.x
158	355	-27.55	66.29	4.6	10	5.4	0.5	I	Minshull	2006	1999	10.1111/j.1365-246X.2006.03001.x
158	356	-27.7	65.57	3.4	9.1	5.7	0.5	I	Minshull	2006	1999	10.1111/j.1365-246X.2006.03001.x
158	357	-27.7	65.9	4.1	6.9	2.8	0.5	I	Minshull	2006	1999	10.1111/j.1365-246X.2006.03001.x
158	358	-28.03	66	2.7	6.5	3.8	0.5	I	Minshull	2006	1999	10.1111/j.1365-246X.2006.03001.x
159	359	31.8	-72.7	5.8	13.7	7.9	0.5	A	Mithal	1989	1985	10.1111/j.1365-246X.1989.tb00501.x
160	360	-7.1	161.62	5.1	12.9	7.8	1	P	Miura	2004	1995	10.1016/j.tecto.2003.09.029
161	361	27.6	-70.05	6.3	14.3	8	0.5	A	Morris	1993	1985	10.1029/93JB00557
161	362	27.5	-70.35	6.6	13.6	7	0.5	A	Morris	1993	1985	10.1029/93JB00557
161	363	27.9	-71.15	6.6	14.6	8	0.5	A	Morris	1993	1985	10.1029/93JB00557
162	364	-34.25	-74.2	4.7	10.6	5.9	0.7	P	Moscoso	2011	2008	10.1016/j.epsl.2011.04.025
163	365	-27.71	66.05	3.8	7.8	4	1.2	I	Muller	1999	1994	10.1130/0091-7613(1999)​027<0867:SAMSAT>​2.3.CO;2
163	366	-27.71	66.42	2.7	8.5	5.8	1.2	I	Muller	1999	1994	10.1130/0091-7613(1999)​027<0867:SAMSAT>​2.3.CO;2
164	367	-32.28	57.28	2.9	7.2	4.3	1	I	Muller	2000	1994	10.1029/2000JB900262
164	368	-32.73	57.28	0.9	5.8	4.9	1	I	Muller	2000	1994	10.1029/2000JB900262
165	369	20.8	132	5.9	11.2	5.3	1.2	P	Murauchi	1968	1965	10.1029/JB073i010p03143
165	370	23.8	127.9	6.2	12.1	5.9	1.2	P	Murauchi	1968	1965	10.1029/JB073i010p03143
165	371	23.7	145.2	6.5	13.4	6.9	1.2	P	Murauchi	1968	1965	10.1029/JB073i010p03143
165	372	14.1	131	5.8	11.8	6	1.2	P	Murauchi	1968	1965	10.1029/JB073i010p03143
166	373	13.11	63.23	7.62	12.7	5.08	1.5	I	Naini	1982	1974	N/A_naini1982
166	374	17.59	63.9	6.1	13.1	7	1.5	I	Naini	1982	1974	N/A_naini1982
166	375	19.11	62.93	4.4	11.3	6.9	1.5	I	Naini	1982	1974	N/A_naini1982
166	376	12.79	65.04	6.1	11.9	5.8	1.5	I	Naini	1982	1974	N/A_naini1982
166	377	12.58	65.28	6.1	11	4.9	1.5	I	Naini	1982	1974	N/A_naini1982
166	378	15.24	66.21	6.1	11.6	5.5	1.5	I	Naini	1982	1974	N/A_naini1982
166	379	13.77	67.236	5.8	10.1	4.3	1.5	I	Naini	1982	1974	N/A_naini1982
166	380	14.91	67.35	6.1	10.4	4.3	1.5	I	Naini	1982	1974	N/A_naini1982
166	381	18.64	65.18	6.3	12	5.7	1.5	I	Naini	1982	1974	N/A_naini1982
167	382	24.5	-67.5	3	11	8	0.7	A	NAT_Study_Group	1985	1981	10.1029/JB090iB12p10321
167	383	23	-43	3	9.2	6.2	0.7	A	NAT_Study_Group	1985	1981	10.1029/JB090iB12p10321
168	384	30.8	136.4	4.4	11.6	7.2	1	P	Nishizawa	2006	2002	N/A1
168	385	30	137.62	5.2	12.1	6.9	1	P	Nishizawa	2006	2002	N/A1
169	386	20.8	135.9	6.5	11	4.5	1	P	Nishizawa	2007	2004	N/A2
169	387	19.95	137.2	5.7	11.5	5.8	1	P	Nishizawa	2007	2004	N/A2
169	388	16.4	135.4	6.1	10.3	4.2	1	P	Nishizawa	2007	2004	N/A2
169	389	16.4	136.8	5.5	10.5	5	1	P	Nishizawa	2007	2004	N/A2
169	390	16.4	137.4	4.8	10.4	5.6	1	P	Nishizawa	2007	2004	N/A2
170	391	29	132.15	5.5	12.7	7.2	0.5	P	Nishizawa	2014	2004	10.1186/1880-5981-66-25
170	392	20.9	133.7	5.8	13.1	7.3	0.5	P	Nishizawa	2014	2004	10.1186/1880-5981-66-25
170	393	23.1	129.05	5.8	10.7	4.9	0.5	P	Nishizawa	2014	2004	10.1186/1880-5981-66-25
170	394	21.1	132.08	5	12	7	0.5	P	Nishizawa	2014	2004	10.1186/1880-5981-66-25
170	395	26.85	131.95	5.1	11	5.9	0.5	P	Nishizawa	2014	2004	10.1186/1880-5981-66-25
170	396	22.4	133.4	5.4	11.8	6.4	0.5	P	Nishizawa	2014	2004	10.1186/1880-5981-66-25
170	397	23.3	135.8	5.7	13.1	7.4	0.5	P	Nishizawa	2014	2004	10.1186/1880-5981-66-25
171	398	-37.82	49.45	3.3	8.5	5.2	0.5	I	Niu	2015	2012	10.1002/2014GC005645
171	399	-37.73	50.01	2.9	8.7	5.8	0.5	I	Niu	2015	2012	10.1002/2014GC005645
171	400	-37.65	50.48	2	12.2	10.2	0.5	I	Niu	2015	2012	10.1002/2014GC005645
172	401	27.26	149.18	5.9	13.3	7.4	0.7	P	Oikawa	2010	2006	10.5047/eps.2010.02.011
172	402	26.2	150.46	5.8	13	7.2	0.7	P	Oikawa	2010	2006	10.5047/eps.2010.02.011
172	403	26.84	149.2	6	13.1	7.1	0.7	P	Oikawa	2010	2006	10.5047/eps.2010.02.011
172	404	27.94	150.28	6	13.1	7.1	0.7	P	Oikawa	2010	2006	10.5047/eps.2010.02.011
173	405	9	-104.2	1.8	7.8	6	1	P	Orcutt	1976	1974	10.1111/j.1365-246X.1976.tb00328.x
174	406	-12.87	-103.82	3.5	9	5.5	1	P	Orcutt	1984	1982	10.1144/GSL.SP.1984.013.01.01
175	407	58.4	-53.4	1.8	4.5	2.7	1	A	Osler	1992	1988	10.1016/0012-821X(92)90026-R
175	408	58.65	-54.3	2.2	6.3	4.1	1	A	Osler	1992	1988	10.1016/0012-821X(92)90026-R
176	409	22.55	-108.9	3	9.4	6.4	0.5	P	Paramo	2008	2002	10.1029/2007JB005113
176	410	22.3	-108.2	2.9	9.3	6.4	0.5	P	Paramo	2008	2002	10.1029/2007JB005113
177	411	-37	23.65	6.1	12.1	6	0.7	A	Parsiegla	2009	2005	1029/2008gc002196
178	412	46.6	-125.9	3.9	9.8	5.9	0.7	P	Parsons	1998	1995	10.1130/0091-7613(1998)026<0199:ANVITC>2.3.CO;2
179	413	36.45	-13.9	5.7	12.1	6.4	1.2	A	Peirce	1991	1988	10.1111/j.1365-246X.1991.tb03898.x
179	414	38.15	-15	6	11	5	1.2	A	Peirce	1991	1988	10.1111/j.1365-246X.1991.tb03898.x
180	415	12.6	113.4	3	8.1	5.1	0.5	P	Pichot	2014	2011	10.1016/j.marpetgeo.2013.10.008
181	416	13.75	-24.2	5.2	12	6.8	1	A	Pim	2008	2004	10.1016/j.epsl.2008.05.012
182	417	-4.73	-11.78	2.6	8.7	6.1	0.3	A	Planert	2009	2000	10.1029/2008JB006103
182	418	-5.06	-11.71	2.6	5.3	2.7	0.3	A	Planert	2009	2000	10.1029/2008JB006103
182	419	-5.21	-11.65	2.9	8	5.1	0.3	A	Planert	2009	2000	10.1029/2008JB006103
182	420	-4.7	-12.3	1.9	10.8	8.9	0.3	A	Planert	2009	2000	10.1029/2008JB006103
182	421	-5.1	-12.2	3	7.9	4.9	0.3	A	Planert	2009	2000	10.1029/2008JB006103
182	422	-4.8	-12.28	2.8	10.3	7.5	0.3	A	Planert	2009	2000	10.1029/2008JB006103
182	423	-4.75	-12.06	2.9	9.7	6.8	0.3	A	Planert	2009	2000	10.1029/2008JB006103
183	424	-11.8	115.93	5.8	14.1	8.3	0.5	I	Planert	2010	2006	10.1029/2009jb006713
183	425	-11.4	115.98	6.1	14.9	8.8	0.5	I	Planert	2010	2006	10.1029/2009jb006713
183	426	-11.65	118.91	5.6	14.3	8.7	0.5	I	Planert	2010	2006	10.1029/2009jb006713
183	427	-11.4	118.95	5.6	14.1	8.5	0.5	I	Planert	2010	2006	10.1029/2009jb006713
184	428	36.8	-33.55	1.5	6.2	4.7	1	A	Poehls	1974	1972	10.1029/JB079i023p03370
185	429	35.65	-26.25	4.1	10.5	6.4	1.2	A	Potts	1986	1982	10.1111/j.1365-246X.1986.tb00668.x
185	430	35.9	-26.4	4.5	9.4	4.9	1.2	A	Potts	1986	1982	10.1111/j.1365-246X.1986.tb00668.x
186	431	10.85	-44.4	4.9	11.3	6.4	1.2	A	Potts	1986	1982	10.1111/j.1365-246X.1986.tb03840.x
186	432	10.85	-44	4.7	10	5.3	1.2	A	Potts	1986	1982	10.1111/j.1365-246X.1986.tb03840.x
187	433	34.6	-11.5	6.2	11	4.8	1.2	A	Purdy	1975	1971	10.1111/j.1365-246X.1975.tb06206.x
187	434	35.7	-13.2	6.8	12	5.2	1.2	A	Purdy	1975	1971	10.1111/j.1365-246X.1975.tb06206.x
188	435	31.3	-68.25	6	13.2	7.2	1	A	Purdy	1983	1979	10.1111/j.1365-246X.1983.tb02808.x
189	436	22.9	-44.97	3.5	9.6	6.1	1.2	A	Purdy	1986	1980	10.1029/JB091iB03p03739
190	437	11.2	113.5	5.5	11	5.5	1	P	Qiu	2011	2008	10.3969/j.issn.0001-5733.2011.12.012
191	438	27.4	-121.58	7.17	11.61	4.44	1.5	P	Raitt	1956	1952	10.1130/0016-7606(1956)67[1623:SSOTPO]2.0.CO;2
191	439	19.37	-128.5	5.73	10.73	5	1.5	P	Raitt	1956	1952	10.1130/0016-7606(1956)67[1623:SSOTPO]2.0.CO;2
191	440	14.68	-151.9	4.95	11.06	6.11	1.5	P	Raitt	1956	1952	10.1130/0016-7606(1956)67[1623:SSOTPO]2.0.CO;2
191	441	20.43	-154.9	6.97	12.41	5.44	1.5	P	Raitt	1956	1952	10.1130/0016-7606(1956)67[1623:SSOTPO]2.0.CO;2
191	442	10.03	-177.32	7.87	13.04	5.17	1.5	P	Raitt	1956	1952	10.1130/0016-7606(1956)67[1623:SSOTPO]2.0.CO;2
191	443	12.45	168.37	5.74	11.24	5.5	1.5	P	Raitt	1956	1952	10.1130/0016-7606(1956)67[1623:SSOTPO]2.0.CO;2
191	444	11.2	165.17	7.59	13.12	5.53	1.5	P	Raitt	1956	1952	10.1130/0016-7606(1956)67[1623:SSOTPO]2.0.CO;2
191	445	-9.02	174.93	6.33	11.81	5.48	1.5	P	Raitt	1956	1952	10.1130/0016-7606(1956)67[1623:SSOTPO]2.0.CO;2
191	446	-17.47	-160.98	5.76	10.96	5.2	1.5	P	Raitt	1956	1952	10.1130/0016-7606(1956)67[1623:SSOTPO]2.0.CO;2
191	447	-12.78	-143.55	6.91	11.77	4.86	1.5	P	Raitt	1956	1952	10.1130/0016-7606(1956)67[1623:SSOTPO]2.0.CO;2
191	448	10.67	-142.42	7.21	12.04	4.83	1.5	P	Raitt	1956	1952	10.1130/0016-7606(1956)67[1623:SSOTPO]2.0.CO;2
191	449	-10.75	-133.58	6.16	10.55	4.39	1.5	P	Raitt	1956	1952	10.1130/0016-7606(1956)67[1623:SSOTPO]2.0.CO;2
191	450	-11.77	-128.95	5.41	9.7	4.29	1.5	P	Raitt	1956	1952	10.1130/0016-7606(1956)67[1623:SSOTPO]2.0.CO;2
191	451	-7.33	-118.67	4.51	9.18	4.67	1.5	P	Raitt	1956	1952	10.1130/0016-7606(1956)67[1623:SSOTPO]2.0.CO;2
191	452	0.18	-123.43	5.21	10.05	4.84	1.5	P	Raitt	1956	1952	10.1130/0016-7606(1956)67[1623:SSOTPO]2.0.CO;2
191	453	5.78	-123.98	4.85	9.64	4.79	1.5	P	Raitt	1956	1952	10.1130/0016-7606(1956)67[1623:SSOTPO]2.0.CO;2
191	454	14.97	-124.2	6.38	10.8	4.42	1.5	P	Raitt	1956	1952	10.1130/0016-7606(1956)67[1623:SSOTPO]2.0.CO;2
192	455	-23.42	-71.67	4.5	12	7.5	1	P	Ranero	2004	1995	10.1029/JB095iB10p15529
193	456	66.2	1.3	4.2	9.8	5.6	1	A	Raum	2006	1996	10.1016/j.tecto.2005.12.008
194	457	76.9	7.5	2.4	5	2.6	1.2	A	Ritzmann	2002	1997	10.1023/B:MARI.0000018168.89762.a4
194	458	77.2	10.1	2.5	6.1	3.6	1.2	A	Ritzmann	2002	1997	10.1023/B:MARI.0000018168.89762.a4
195	459	5.8	-46.1	6.9	14	7.1	1	A	Rodger	2006	2003	10.1130/G22966A.1
196	460	-4.95	-106.1	3	10.1	7.1	0.3	P	Roland	2011	2008	10.1029/2012jb009422
196	461	-4.65	-105.9	3.1	10	6.9	0.3	P	Roland	2011	2008	10.1029/2012jb009422
196	462	-4.15	-102.95	3.3	9.8	6.5	0.3	P	Roland	2011	2008	10.1029/2012jb009422
196	463	-3.75	-102.8	3.2	9.7	6.5	0.3	I	Roland	2011	2008	10.1029/2012jb009422
197	464	15.2	115.1	5.5	10.9	5.4	0.5	P	Ruan	2016	2013	10.1016/j.tecto.2016.09.022
197	465	15.2	116.1	4.2	9.4	5.2	0.5	P	Ruan	2016	2013	10.1016/j.tecto.2016.09.022
197	466	14.5	115.8	4.3	10.4	6.1	0.5	P	Ruan	2016	2014	10.1016/j.tecto.2016.09.022
197	467	14.5	116.5	4.4	9.8	5.4	0.5	P	Ruan	2016	2014	10.1016/j.tecto.2016.09.022
198	468	9.58	-86.22	4	11.1	7.1	1.2	P	Sallares	2001	1995	10.1029/2000JB900245
199	469	-9.3	35.22	8.3	16	7.7	0.5	A	Sallares	2011	2009	10.1016/j.epsl.2011.09.003
199	470	-9.1	35.6	7.7	15.5	7.8	0.5	A	Sallares	2011	2009	10.1016/j.epsl.2011.09.003
200	471	-43.2	-78.4	3.8	9.1	5.3	0.7	P	Scherwath	2009	2009	10.1111/j.1365-246X.2009.04298.x
200	472	-42.8	-76.2	3.7	8.9	5.2	0.7	P	Scherwath	2009	2005	10.1111/j.1365-246X.2009.04298.x
200	473	-45	-78	2.8	7.4	4.6	0.7	P	Scherwath	2009	2005	10.1111/j.1365-246X.2009.04298.x
200	474	-44.88	-76.45	2.8	8.2	5.4	0.7	P	Scherwath	2009	2005	10.1111/j.1365-246X.2009.04298.x
200	475	-45.9	-76.9	2.1	6.9	4.8	0.7	P	Scherwath	2009	2005	10.1111/j.1365-246X.2009.04298.x
200	476	-45.83	-76.2	2.3	7.3	5	0.7	P	Scherwath	2009	2005	10.1111/j.1365-246X.2009.04298.x
201	477	43.7	-23.5	4.5	11.4	6.9	1	A	Searle	1978	1970	10.1111/j.1365-246X.1978.tb03742.x
201	478	44.2	-22.1	4.3	12.1	7.8	1	A	Searle	1978	1970	10.1111/j.1365-246X.1978.tb03742.x
202	479	37.32	-32.4	1.5	9.5	8	0.5	A	Seher	2010	2005	10.1029/2009JB006650
202	480	37.41	-32.21	2.7	8.2	5.5	0.5	A	Seher	2010	2005	10.1029/2009JB006650
203	481	-70.9	174.1	1.7	3.2	1.5	0.7	P	Selvans	2014	2007	10.1016/j.epsl.2014.08.029
204	482	-23.82	-165.53	6.9	13.4	6.5	1	P	Shearer	1988	1983	10.1111/j.1365-246X.1985.tb05105.x
205	483	2.8	-18.9	6.2	10.5	4.3	1.2	A	Sheridan	1969	1965	10.1029/JB074i010p02512
206	484	41.3	159.95	5.8	12.9	7.1	0.7	P	Shinohara	2008	2001	10.1016/j.pepi.2008.07.039
207	485	50.5	-176.8	7.7	13.3	5.6	1.2	P	Shor	1962	1956	NA5
207	486	53.7	-161.2	7.5	13.6	6.1	1.2	P	Shor	1962	1956	NA5
208	487	22.95	-152.98	5	10.1	5.1	1.2	P	Shor	1964	1962	10.1029/JZ069i008p01627
208	488	22.73	-153.72	4.9	9.9	5	1.2	P	Shor	1964	1962	10.1029/JZ069i008p01627
208	489	22.5	-154.42	4.9	11.6	6.7	1.2	P	Shor	1964	1962	10.1029/JZ069i008p01627
208	490	22.42	-156.52	4.9	11.1	6.2	1.2	P	Shor	1964	1962	10.1029/JZ069i008p01627
208	491	23.05	-156.53	4.2	9.1	4.9	1.2	P	Shor	1964	1962	10.1029/JZ069i008p01627
208	492	23.62	-156.13	4.2	10.8	6.6	1.2	P	Shor	1964	1962	10.1029/JZ069i008p01627
208	493	21.95	-154.8	4.7	10.7	6	1.2	P	Shor	1964	1962	10.1029/JZ069i008p01627
208	494	22.48	-155.63	4.4	9.1	4.7	1.2	P	Shor	1964	1962	10.1029/JZ069i008p01627
208	495	23.12	-156.17	4.3	11.6	7.3	1.2	P	Shor	1964	1962	10.1029/JZ069i008p01627
208	496	23.18	-157.12	4.4	11	6.6	1.2	P	Shor	1964	1962	10.1029/JZ069i008p01627
209	497	43	-134.45	4.4	10.2	5.8	1.2	P	Shor	1968	1954	10.1029/JB073i006p02175
209	498	43.75	-137.1	4.5	10.2	5.7	1.2	P	Shor	1968	1954	10.1029/JB073i006p02175
209	499	43.92	-125.83	3.8	10.3	6.5	1.2	P	Shor	1968	1954	10.1029/JB073i006p02175
209	500	44.68	-125.85	3.8	9.8	6	1.2	P	Shor	1968	1954	10.1029/JB073i006p02175
209	501	44.7	-132.63	4.3	9.8	5.5	1.2	P	Shor	1968	1954	10.1029/JB073i006p02175
209	502	45	-131.6	3.9	9.6	5.7	1.2	P	Shor	1968	1954	10.1029/JB073i006p02175
209	503	46.08	-128.2	3.9	8.8	4.9	1.2	P	Shor	1968	1954	10.1029/JB073i006p02175
209	504	46.5	-127.03	4	8.8	4.8	1.2	P	Shor	1968	1954	10.1029/JB073i006p02175
210	505	-10.83	113.3	7.6	17.3	9.7	0.7	I	Shulgin	2011	1999	10.1111/j.1365-246X.2010.04834.x
211	506	1.7	96.05	7	14.2	7.2	0.5	I	Shulgin	2013	2006	10.1016/j.epsl.2012.12.032
212	507	4.1	93.05	8.2	14	5.8	0.7	I	Singh	2011	2006	10.1111/j.1365-246X.2010.04823.x
212	508	2.5	94.5	8.5	13.8	5.3	0.7	I	Singh	2011	2006	10.1111/j.1365-246X.2010.04823.x
213	509	35.4	-36.8	2.5	9.1	6.6	1.2	A	Sinha	1983	1979	10.1111/j.1365-246X.1983.tb05007.x
213	510	35.7	-36.7	3.1	6.3	3.2	1.2	A	Sinha	1983	1979	10.1111/j.1365-246X.1983.tb05007.x
213	511	36	-36.6	3.2	7.1	3.9	1.2	A	Sinha	1983	1979	10.1111/j.1365-246X.1983.tb05007.x
214	512	11.52	-23.52	5.2	9.2	4	1.5	A	Spathopoulos	1993	1985	10.1016/0040-1951(93)90280-W
214	513	11	-23.03	5.3	11.4	6.1	1.5	A	Spathopoulos	1993	1985	10.1016/0040-1951(93)90280-W
215	514	28.8	-117.4	3.8	8.8	5	0.3	P	Spudich	1980	1959	10.1029/JB085iB03p01409
216	515	41.8	-30.7	1.8	7.4	5.6	1.2	A	Steinmetz	1977	1974	10.1111/j.1365-246X.1977.tb04178.x
217	516	-173.8	-26.3	5.9	12	6.1	1	P	Stratford	2016	2011	10.1002/2015GC005873
218	517	32.05	142.9	6.2	13.3	7.1	1.2	P	Taira	1998	1991	10.1111/j.1440-1738.1998.00198.x
219	518	32.2	143	6.8	14.4	7.6	1	P	Takahashi	1998	1992	10.1111/j.1440-1738.1998.00197.x
220	519	39.06	144.88	8.2	13.3	5.1	1.5	P	Takahashi	2004	1997	10.1111/j.1365-246X.2004.02350.x
221	520	38.7	-38.8	5	11	6	1.5	A	Talwani	1965	1962	10.1029/JZ070i002p00341
221	521	38.9	-36.9	4.2	8.9	4.7	1.5	A	Talwani	1965	1962	10.1029/JZ070i002p00341
221	522	38.6	-35.5	3.8	8.1	4.3	1.5	A	Talwani	1965	1962	10.1029/JZ070i002p00341
221	523	32	-32.5	4.3	9.8	5.5	1.5	A	Talwani	1965	1962	10.1029/JZ070i002p00341
221	524	32	-31.6	4.4	11	6.6	1.5	A	Talwani	1965	1962	10.1029/JZ070i002p00341
222	525	6.73	91.93	3.7	9.1	5.4	1	P	Teagle	2006	1999	10.2204/iodp.proc.309312.103.2006
223	526	-33.3	-14.35	3.4	6.9	3.5	1.2	A	Tolstoy	1993	1990	10.1126/science.262.5134.726
223	527	-32.88	-14.45	2.3	10.2	7.9	1.2	A	Tolstoy	1993	1990	10.1126/science.262.5134.726
224	528	34.76	-121.95	4.8	11.8	7	1.2	P	Trehu	1991	1986	10.1029/90JB00494
225	529	39	145.1	5	12.2	7.2	1.2	P	Tsuru	2002	1996	10.1029/2001JB001664
226	530	10.4	-104.1	3.2	8.6	5.4	0.5	P	VanAvendonk	2001	1994	10.1029/2000JB900459
226	531	10.05	-104	3.1	8.7	5.6	0.5	P	VanAvendonk	2001	1994	10.1029/2000JB900459
227	532	11.05	-87.7	4.8	11.1	6.3	0.3	P	VanAvendonk	2011	2008	10.1029/2011GC003592
227	533	9.85	-86.4	3.9	10.7	6.8	0.3	P	VanAvendonk	2011	2008	10.1029/2011GC003592
228	534	9.57	-104.23	2.9	9.5	6.6	0.5	P	Vera	1990	1985	10.1029/JB095iB10p15529
228	535	9.53	-104.15	3.3	11.4	8.1	0.5	P	Vera	1990	1985	10.1029/JB095iB10p15529
229	536	57.8	-21.1	3.9	10.6	6.7	1	A	Vogt	1998	1988	10.1029/98JB00604
230	537	72.33	-12	2.6	8.3	5.7	1	A	Voss	2007	2003	10.1111/j.1365-246X.2007.03438.x
230	538	73.2	-13.1	3.2	10.1	6.9	1	A	Voss	2007	2003	10.1111/j.1365-246X.2007.03438.x
231	539	10.95	-87.78	3.2	8.3	5.1	1	P	Walther	2000	1996	10.1046/j.1365-246x.2000.00134.x
232	540	19.2	-159.3	4.4	11.7	7.3	0.5	P	Watts	1985	1982	10.1038/315105a0
232	541	24.3	-157.5	4.2	10.6	6.4	0.5	P	Watts	1985	1982	10.1038/315105a0
232	542	26.17	-17.93	6.1	12.5	6.4	1	A	Watts	1997	1993	10.1038/315105a0
232	543	30.16	-15.17	6.2	12.7	6.5	1	A	Watts	1997	1993	10.1038/315105a0
233	544	29.15	-27	4.4	10.6	6.2	1	A	Weigel	1999	1990	10.1016/s0264-3707(98)00030-1
234	545	51.92	-30.9	2.2	8	5.8	1.2	A	Whitmarsh	1986	1982	10.1111/j.1365-246X.1986.tb05174.x
234	546	52.4	-30.95	4.1	7.6	3.5	1.2	A	Whitmarsh	1986	1982	10.1111/j.1365-246X.1986.tb05174.x
234	547	51.8	-30.95	2.5	10.2	7.7	1.2	A	Whitmarsh	1986	1982	10.1111/j.1365-246X.1986.tb05174.x
235	548	17.25	-23.6	4.7	11.5	6.8	0.5	A	Wilson	2013	2004	10.1093/gji/ggt034
236	549	40.65	-59.3	9.1	12.2	3.1	0.5	A	Wu	2006	2001	10.1111/j.1365-246X.2006.02991.x
237	550	-38	49.6	1.8	4.3	2.5	0.5	I	Zhao	2013	2010	10.1002/ggge.20264
237	551	-37.7	49.7	2.1	8.9	6.8	0.5	I	Zhao	2013	2010	10.1002/ggge.20264
